# Supplementary material for: Bacterial Surface Disturbances Affecting Cell Function during Exposure to Three-Compound Nanocomposites Based on Graphene Materials
Source: MDPI journal article supplement (doi:10.3390/nano12173058), 2022-09-02
Supplement: s1 [file s1]

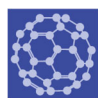

## Supplementary Materials

# Bacterial Surface Disturbances Affecting Cell Function during Exposure to Three-Compound Nanocomposites Based on Graphene Materials

Agata Lange <sup>1,\*</sup>, Ewa Sawosz <sup>1</sup>, Karolina Daniluk <sup>1</sup>, Mateusz Wierzbicki <sup>1</sup>, Artur Małolepszy <sup>2</sup>,  
Marcin Gołębiewski <sup>3</sup> and Sławomir Jaworski <sup>1,\*</sup>

<sup>1</sup> Department of Nanobiotechnology, Institute of Biology, Warsaw University of Life Sciences, 02-786 Warsaw, Poland

<sup>2</sup> Faculty of Chemical and Process Engineering, Warsaw University of Technology, 00-654 Warsaw, Poland

<sup>3</sup> Department of Animal Breeding, Institute of Animal Sciences, Warsaw University of Life Sciences, 02-786 Warsaw, Poland

\* Correspondence: agata\_lange@sggw.edu.pl (A.L.); slawomir\_jaworski@sggw.edu.pl (S.J.);  
Tel.: +48-225936675 (S.J.)

## Analysis of zeta potential dependence on pH

Zeta potential was measured by electrophoretic light scattering (ELS) using the Zeta Sizer Nano-ZS90 analyzer (Malvern Instruments, Malvern, UK) at room temperature for all nanomaterials, preceded by sonication at 500 W and 20 kHz for 2 min, and in case of nanocomposites, they were left for 15 min for self-combination. Each nanosuspension was measured in 3 different pH values (4, 7 and 10).

**Citation:** Lange, A.; Sawosz, E.; Daniluk, K.; Wierzbicki, M.; Małolepszy, A.; Gołębiewski, M.; Jaworski, S. Bacterial Surface Disturbances Affecting Cell Function during Exposure to Three-Compound Nanocomposites Based on Graphene Materials. *Nanomaterials* **2022**, *12*, 3058. <https://doi.org/10.3390/nano12173058>

Academic Editors: Maria Letizia Manca and Heyou Han

Received: 26 July 2022

Accepted: 30 August 2022

Published: 2 September 2022

**Publisher's Note:** MDPI stays neutral with regard to jurisdictional claims in published maps and institutional affiliations.

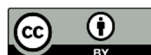

**Copyright:** © 2022 by the authors. Licensee MDPI, Basel, Switzerland. This article is an open access article distributed under the terms and conditions of the Creative Commons Attribution (CC BY) license (<https://creativecommons.org/licenses/by/4.0/>).

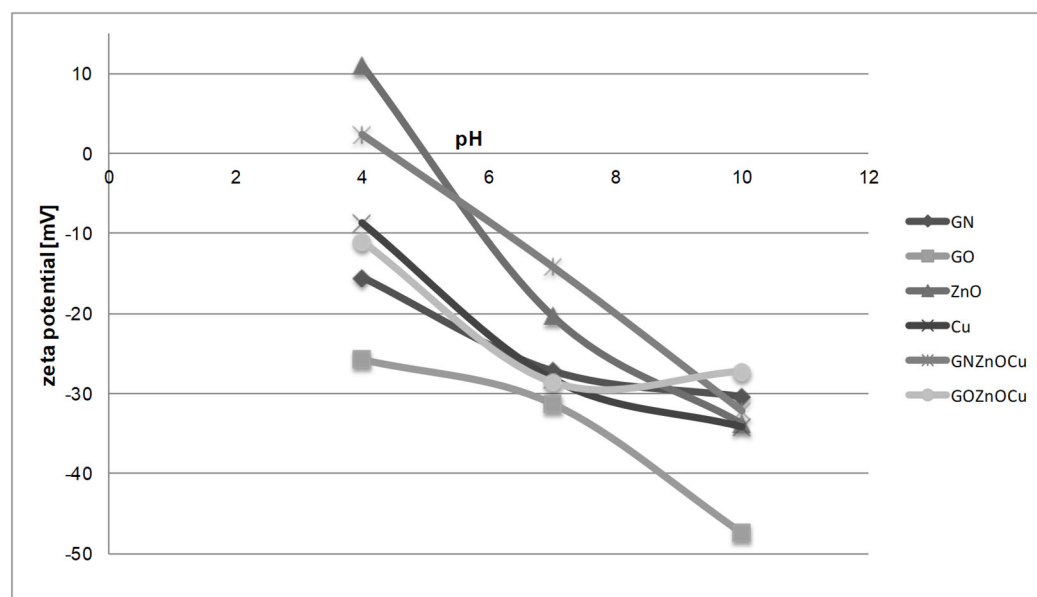

**Figure S1.** Zeta potential of nanomaterials tested in different pH values. Each measurement was performed in triplicate.

## pH analysis of nanoparticles in culture medium

The pH measurements of nanomaterials in Mueller–Hinton broth medium (Bio-maxima, Lublin, Poland) were measured with the use of the pH meter SI Analytics HandyLab 100 (Xylem Water Solutions, Washington, WA, USA). Each measurement was conducted in two time points: immediately after added nanoparticles into medium (0h) and after 24 hours of incubation (24h). The analysis was performed in triplicate at the room temperature.

**Table S1.** pH values of nanomaterials tested in culture medium in two time points (0h and 24h). Results are presented as a mean values  $\pm$  standard deviation. C is control medium without nanoparticles.

| Nanomaterials | 0h              | 24h             |
|---------------|-----------------|-----------------|
| C             | 7.29 $\pm$ 0.11 | 7.29 $\pm$ 0.01 |
| GN            | 7.28 $\pm$ 0.02 | 7.28 $\pm$ 0.01 |
| GO            | 7.28 $\pm$ 0.03 | 7.28 $\pm$ 0.01 |
| ZnO           | 7.33 $\pm$ 0.02 | 7.36 $\pm$ 0.01 |
| Cu            | 7.29 $\pm$ 0.02 | 7.30 $\pm$ 0.01 |
| GNZnOCu       | 7.32 $\pm$ 0.02 | 7.31 $\pm$ 0.01 |
| GOZnOCu       | 7.31 $\pm$ 0.02 | 7.31 $\pm$ 0.01 |
